# Supplementary material
Source: publisher figshare collection journal article supplement (https://diabetesjournals.figshare.com/articles/dataset/_/12990773)
Supplement: Supplementary file 2 [file 2]

## Supplemental Data

**Supplementary Table 1. The sources of commercial antibodies and the concentrations of the antibodies used for immunofluorescence (IF), immunoblotting (IB), or immunoprecipitation (IP)**

| Antibody           | Animal            | Vendor                                    | Catalog number | RRID        | Dilution                          | Application |
|--------------------|-------------------|-------------------------------------------|----------------|-------------|-----------------------------------|-------------|
| Insulin            | Guinea pig serum  | H. Kobayashi (Gunma University)           |                |             | 1/500                             | IF          |
| Granuphilin        | Rabbit polyclonal | Homemade (Ref. 19)                        | $\alpha$ Grp-N |             | IB 1/1000<br>IF 1/100             | IB, IF      |
| Melanophilin       | Goat polyclonal   | Everest Biotech, Oxfordshire, UK          | EB05444        | AB_2297905  | 1/1000                            | IB          |
| Melanophilin       | Rabbit polyclonal | Abcam, Cambridge, UK                      | Ab137078       | AB_2732921  | 1/1000                            | IB          |
| HA (hemagglutinin) | Rabbit polyclonal | MBL, Nagoya, Japan                        | 561            | AB_591839   | 1/1000                            | IB          |
| HA (3F10)          | Rat monoclonal    | Roche Diagnostics GmbH, Mannheim, Germany | 11867423001    | AB_390918   | 1/100                             | IF          |
| GAPDH              | Mouse monoclonal  | MBL, Nagoya, Japan                        | M171-3         | AB_10597731 | 1/1000                            | IB          |
| FLAG               | Rabbit polyclonal | Sigma-Aldrich, St.Louis, MO               | F7425          | AB_439687   | IB 1/5000;<br>IF 1/500            | IB, IF      |
| $\beta$ -actin     | Mouse monoclonal  | Sigma-Aldrich, St.Louis, MO               | A5316          | AB_476743   | 1/10000                           | IB          |
| $\alpha$ -tubulin  | Mouse monoclonal  | Sigma-Aldrich, St.Louis, MO               | T5168          | AB_477579   | 1/10000                           | IB          |
| Munc18-3           | Rabbit polyclonal | Sigma-Aldrich, St.Louis, MO               | M7695          | AB_1080121  | 1/1000                            | IB          |
| Syntaxin-1         | Mouse monoclonal  | Sigma-Aldrich, St.Louis, MO               | S0664          | AB_477483   | 1/1000                            | IB          |
| Syntaxin-2         | Rabbit polyclonal | Synaptic Systems, Goettingen, Germany     | 110 123        | AB_887849   | 1/1000                            | IB          |
| Syntaxin-3         | Rabbit polyclonal | Synaptic Systems, Goettingen, Germany     | 110 033        | AB_887851   | 1/1000                            | IB          |
| Syntaxin-4         | Rabbit polyclonal | Synaptic Systems, Goettingen, Germany     | 110 043        | AB_10693907 | IF 1/200; IP<br>2 $\mu$ g /sample | IF, IP      |
| Syntaxin-4         | Rabbit polyclonal | Merck KGaA, Darmstadt, Germany            | AB5330         | AB_91042    | 1/1000                            | IB          |

|                                        |                   |                                           |              |             |                        |        |
|----------------------------------------|-------------------|-------------------------------------------|--------------|-------------|------------------------|--------|
| Myosin-Va                              | Rabbit polyclonal | Cell Signaling Technology, Danvers, MA    | 3402         | AB_2148475  | 1/1000                 | IB     |
| Myosin-Va                              | Rabbit polyclonal | Sigma-Aldrich, St.Louis, MO               | M4812        | AB_260545   | 1/100                  | IF     |
| VAMP2                                  | Rabbit polyclonal | Calbiochem, San Diego, CA                 | 627724       | AB_212589   | 1/500                  | IB     |
| Munc18-2                               | Rabbit polyclonal | LifeSpan BioSciences, Inc., Seattle, WA   | LS-B2356     | AB_2271157  | 1/1000                 | IB     |
| Rab27a                                 | Mouse monoclonal  | BD BioScience, San Jose, CA               | 558532       | AB_647327   | IB 1/1000;<br>IF 1/100 | IB, IF |
| SNAP25                                 | Mouse monoclonal  | BD BioScience, San Jose, CA               | 610366       | AB_397752   | 1/1000                 | IB     |
| Munc18-1                               | Mouse monoclonal  | BD BioScience, San Jose, CA               | 610336       | AB_397726   | 1/10000                | IB     |
| Anti-RFP                               | Rabbit polyclonal | MBL, Nagoya, Japan                        | PM005        | AB_591279   | 1/1000                 | IB     |
| EB1                                    | Mouse monoclonal  | BD BioScience, San Jose, CA               | 610534       | AB_397891   | 1/1000                 | IB     |
| Anti-MBP                               |                   | New England Biolabs, Ipswich, MA          | E8032        | AB_1559730  | 1/10000                | IB     |
| Anti-GST                               |                   | Upstate Biotechnology, New York, NY       | 05-311       | AB_309675   | 1/5000                 | IB     |
| Rhodamine-conjugated phalloidin        |                   | Thermo Fisher Scientific, Waltham, MA     | R415         | AB_2572408  | 1/100                  | IF     |
| Anti-HA Affinity Matrix                | Rat monoclonal    | Roche Diagnostics GmbH, Mannheim, Germany | 11815016001  | AB_390914   | 20 µl /sample          | IP     |
| Anti-FLAG M2 Affinity Gel              | Rabbit polyclonal | Sigma-Aldrich, St.Louis, MO               | A2220        | AB_10063035 | 30 µl /sample          | IP     |
| Protein G Sepharose 4 Fast Flow        |                   | GE Healthcare Biosciences, Piscataway, NJ | GE17-0618-01 |             | 40 µl /sample          | IP     |
| StrepTactin Sepharose High Performance |                   | GE Healthcare Biosciences, Piscataway, NJ | GE28-9355-99 |             | 30 µl /sample          | IP     |
| Amylose Resin                          |                   | New England Biolabs, Ipswich, MA          | E8021        |             | 20 µl /sample          | IP     |

**Supplemental Table 2. Primer for cloning, mutagenesis, and quantitative PCR**

| Target                                        | Primer  | Sequence                          |
|-----------------------------------------------|---------|-----------------------------------|
| Melanophilin full length                      | Forward | GGGGAATTCATGGGGAAAAGGTTGGACCT     |
|                                               | Reverse | GGGCTCGAGTTAGGGCTGCTGGGCCATC      |
| Melanophilin fragment N (1-400)               | Forward | GGGGAATTCATGGGGAAAAGGTTGGACCT     |
|                                               | Reverse | GGGCTCGAGTTAGGTGCTGGAACCACTGATG   |
| Melanophilin fragment 116-400                 | Forward | GGGGAATTCATGGGTTCTCTGGAGTGGTACTA  |
| Melanophilin fragment 126-400                 | Forward | GGGGAATTCATGAGGGCTCGCTTCAAGCGTT   |
| Melanophilin fragment C (147-590)             | Forward | GGGGAATTCATGGGTGGAGGTGGATCTGAGC   |
|                                               | Reverse | GGGCTCGAGTTAGGGCTGCTGGGCCATC      |
| Melanophilin fragment 1-100                   | Forward | GGGCTCGAGCTATGGGGAAAAGGTTGGACCT   |
|                                               | Reverse | GGGGAATTCTTACTGCTCTTCTGGGTGGGC    |
| Melanophilin fragment 1-110                   | Reverse | GGGGAATTCTTAGGCCAGGTGGCAGGGGTC    |
| Melanophilin fragment 1-120                   | Reverse | GGGGAATTCTTACCACTCCAGAGAACCGAT    |
| Melanophilin fragment 1-130                   | Reverse | GGGGAATTCTTACTTGAAGCGAGCCCTCAC    |
| Melanophilin fragment 1-146                   | Reverse | GGGGAATTCTTACTGCAGCCGCCACAGAG     |
| Melanophilin mutation E14A                    | Forward | ACAGACGAGGCGGCTGAGCAC             |
|                                               | Reverse | GTGCTCAGCCGCCTCGTCTGT             |
| Melanophilin mutation D378A/E380A/E381A/E382A | Forward | CCCAGTGCTGCCACAGCGGCGGACACTCAGG   |
|                                               | Reverse | CCTGAGTGTCGCCCGCGCTGTGGCAGCACTGGG |
| Melanophilin mutation A467P                   | Forward | GTTCAGCAGCCTGAGAGTGAG             |
|                                               | Reverse | CTCACTCTCAGGCTGCTGAAC             |
| Melanophilin mutation Y122A                   | Forward | GAGTGGTACGCCAGCACGTGAGG           |
|                                               | Reverse | CCTCACGTGCTGGGCGTACCACTC          |
| Melanophilin mutation H124AK130A              | Forward | CAGGCCGTGAGGGCTCGCTTCGCGCGTTTC    |
|                                               | Reverse | ACTCCCGAAACGCGCGAAGCGAGCCCTCAC    |

|                                                       |         |                                   |
|-------------------------------------------------------|---------|-----------------------------------|
| Melanophilin full length<br>(for EGFP or mCherry tag) | Forward | GGGCTCGAGCTATGGGGAAAAGGTTGGACCT   |
|                                                       | Reverse | GGGGAATTCTTAGGGCTGCTGGGCCATC      |
| Syntaxin-4 full length                                | Forward | GGGGAATTCATGCGCGACAGGACCCAC       |
|                                                       | Reverse | GGGCTCGAGTTATCCAACGGTTATGGTGATG   |
| Syntaxin-4 N-Habc fragment (1-193)                    | Forward | GGGGAATTCATGCGCGACAGGACCCAC       |
|                                                       | Reverse | GGGCTCGAGTTACGTGTCCTTCAGGATATTAGA |
| Syntaxin-4 H3 fragment (194-273)                      | Forward | GGGGAATTCATGCAGGTGACTCGGCAGGCC    |
|                                                       | Reverse | GGGCTCGAGTTACGTGTCCTTCAGGATATTAGA |
| Syntaxin-4 mutation L173A/E174A                       | Forward | GAGGAGGCGGCACAGATG                |
|                                                       | Reverse | CATCTGTGCCGCCTCCTC                |
| Human melanophilin quantitative PCR                   | Forward | GATGGAGAACCTGGCTCAGA              |
|                                                       | Reverse | GGAGAGGAGGCGCTTTTT                |
| GAPDH quantitative PCR                                | Forward | AGGGCTGCTTTTAACTCTGGT             |
|                                                       | Reverse | CCCCACTTGATTTTGGAGGGA             |

## Supplementary Figures

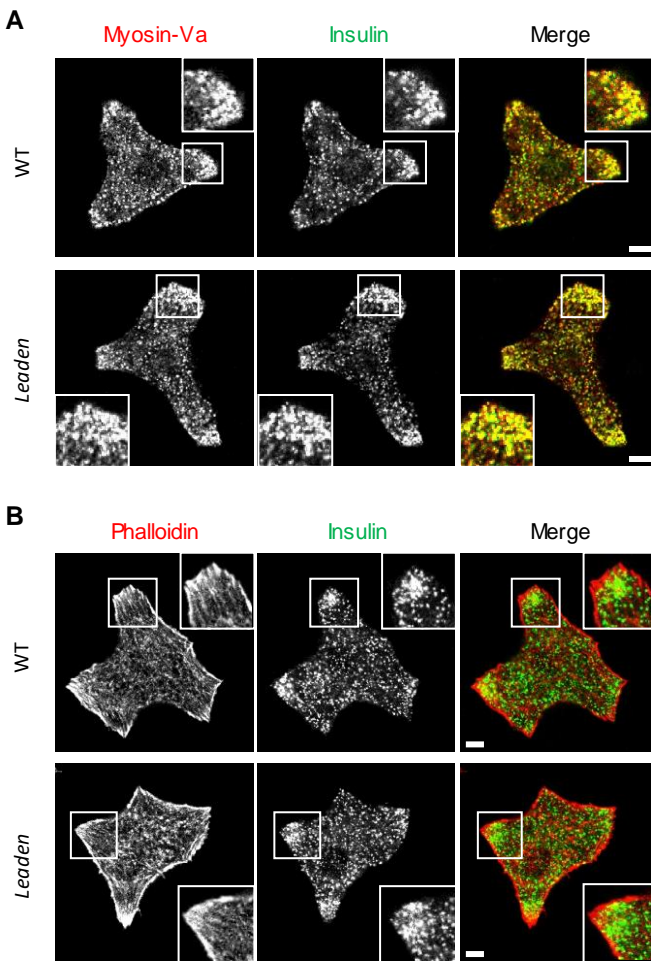

### Supplementary Figure 1. Insulin granules accumulates in the actin-rich cell periphery independent of the presence or absence of melanophilin in $\beta$ -cells

A monolayer of pancreatic islet cells isolated from wild-type or *leaden* mice was fixed and double-stained with anti-insulin antibody and either anti-myosin-Va antibody (upper) or rhodamine-conjugated phalloidin that binds filamentous actin (lower). Insets represent higher magnification micrographs of cells within the region outlined by frames. Bars, 5  $\mu$ m.

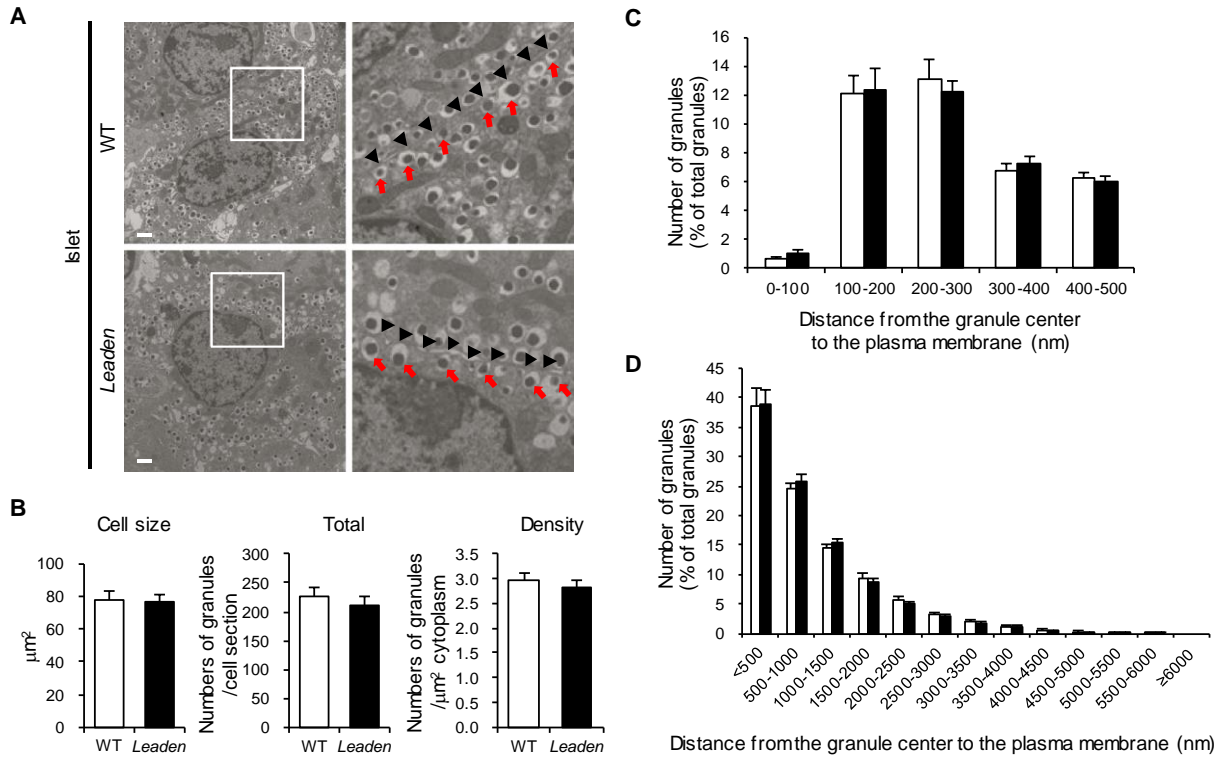

**Supplementary Figure 2. The distribution of insulin granules is not altered in *leaden*  $\beta$ -cells** Islets isolated from 24- to 28-week-old, wild-type (open bars) and *leaden* mice (closed bars) were fixed by immersion with 2% paraformaldehyde, 2% glutaraldehyde, 0.2% picric acid in 0.1 M cacodylate buffer, pH 7.4, for 1.5 h at room temperature and embedded into 1% agarose. They were then postfixed, embedded in plastic resin, and sectioned. The ultrathin sections (80 nm) were observed by electron microscopy. (A) Micrographs were randomly taken at 5000 and 8000 magnifications from 21 individual cells from three mice for each genotype. Squares in left panels are shown at a higher magnification in right panels. Black arrowheads indicate the position of the plasma membrane, whereas red arrows indicate granules directly attached to the plasma membrane. Bar, 1  $\mu\text{m}$ . (B) Cell size (left), total number of granules (middle), and average granule density (right). (C, D) Granules whose centers located within 500 nm from the plasma membrane (C) or total granules (D) were categorized according to the distance from the granule center to the plasma membrane. The statistical significance of differences between means was assessed by Student's *t*-test.

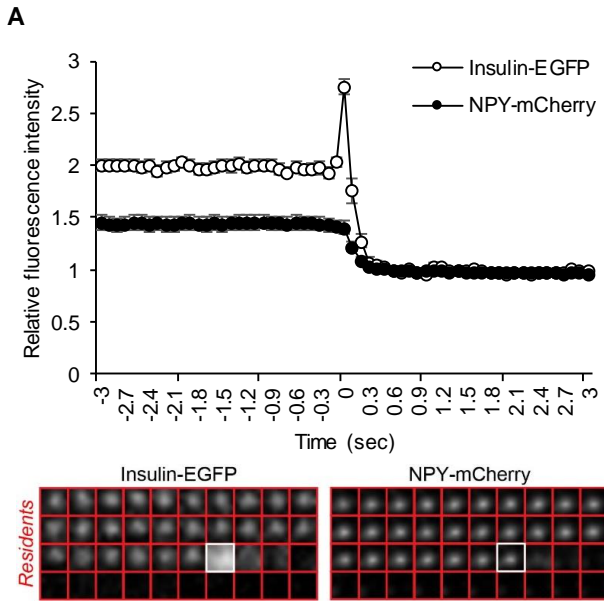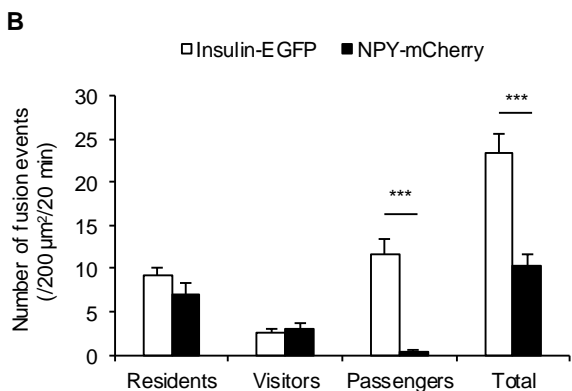

**Supplementary Figure 3. Granules visualized by pH-insensitive NPY-mCherry lack a fluorescence intensity peak and exhibit no *passenger* type of exocytosis**

(A) A monolayer of pancreatic islet cells isolated from wild-type mice was infected with adenovirus encoding Insulin-EGFP or NPY-mCherry, and was stimulated by 25 mmol/L glucose for 20 min under TIRF microscopy. The fluorescence intensity profiles during the resident type of exocytosis (upper) are shown as the mean  $\pm$  SEM for granules labeled by Insulin-EGFP ( $n = 20$  from 10 cells) and those labeled by NPY-mCherry ( $n = 22$  from 8 cells). Kymographs are the sequential TIRF microscopic images acquired every 103 ms during the resident type of exocytosis (lower). Note that granules labeled by NPY-mCherry lack a fluorescence intensity peak during fusion, in contrast to those labeled by Insulin-EGFP. Bar, 1  $\mu\text{m}$ . (B) Numbers of fusion events during 25 mmol/L glucose stimulation for 20 min in wild-type mouse islet cells expressing NPY-mCherry (closed bars;  $n = 10$  cells) were compared with those in cells expressing Insulin-EGFP shown in Fig. 2C (open bars;  $n = 32$  cells). Note that there is almost no *passenger* type of exocytosis in cells expressing NPY-mCherry due to the lack of a flash phenomenon accompanied by a fusion event. \*\*\* $P < 0.001$ ; Student's  $t$ -test.

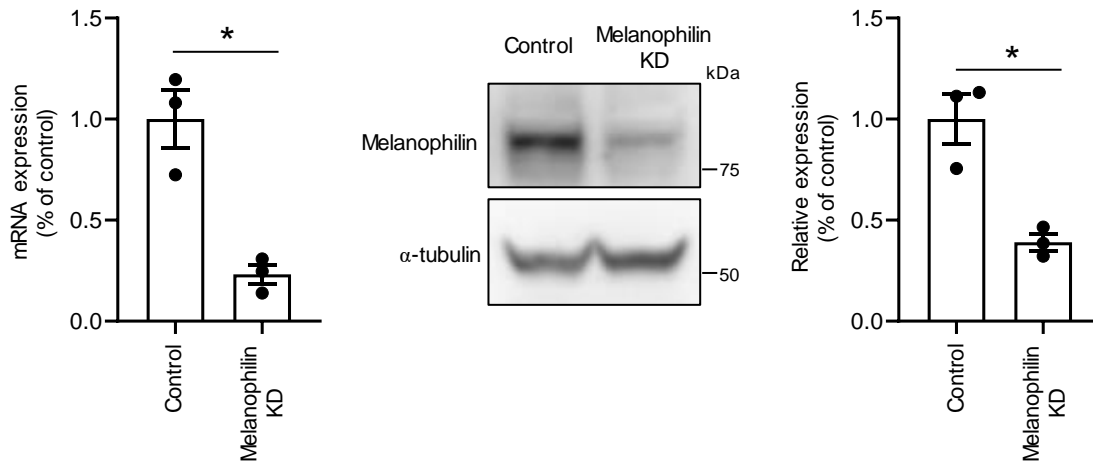

**Supplementary Figure 4. Downregulation of melanophilin in human islet cells**

Melanophilin was knockdown (KD) in human islet cells by siRNA followed by shRNA as described in Research Designs and Methods. The cells were analyzed for melanophilin expression 48 h after the shRNA adenovirus infection. Downregulation was verified by quantitative PCR (left;  $n = 3$ ) and immunoblotting (middle). Protein bands were quantified by densitometric analyses from three independent preparations (right). \* $P < 0.05$ ; Student's  $t$ -test.



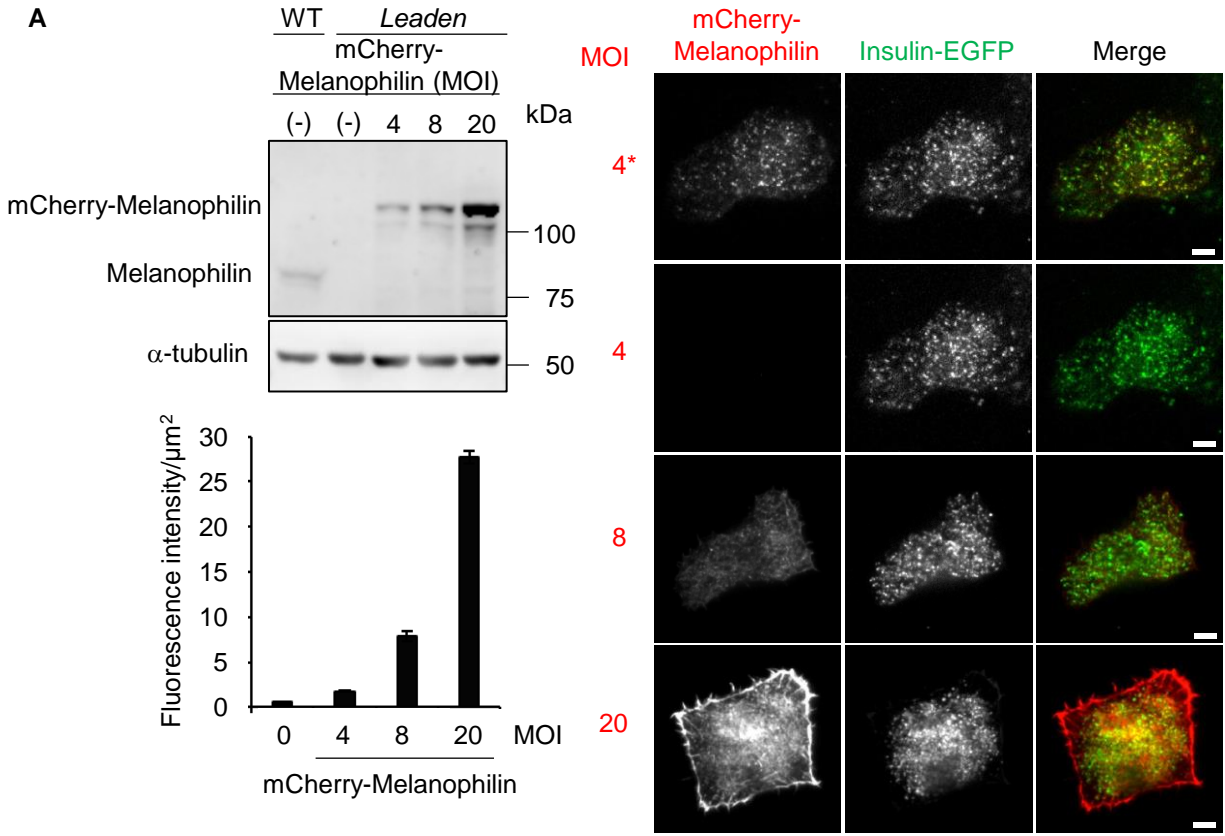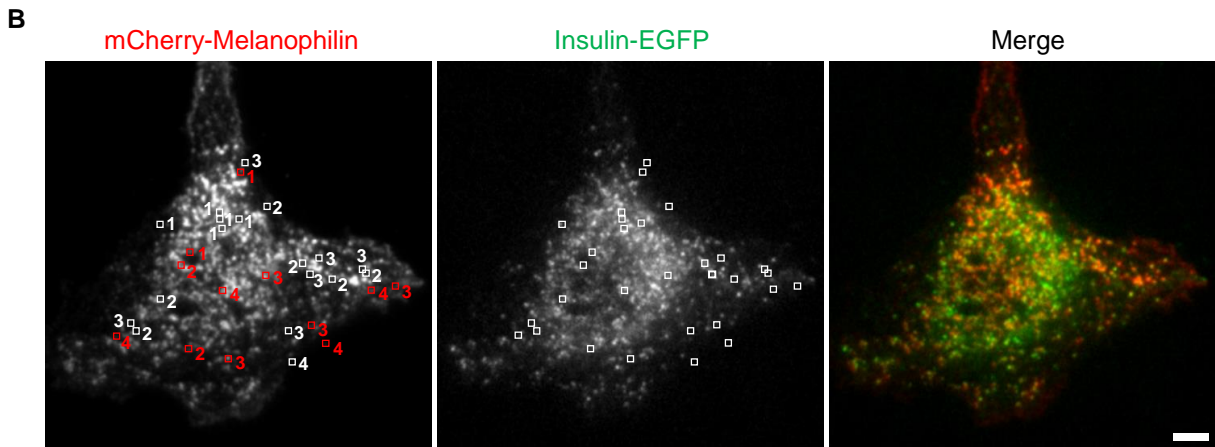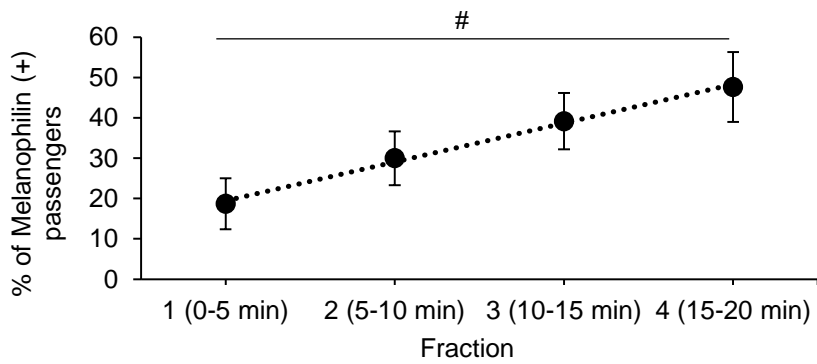

### Supplementary Figure 5. Localization of mCherry-melanophilin expressed in *leaden* islet cells

(A) A monolayer of *leaden* islet cells was infected with adenovirus encoding Insulin-EGFP at multiplicity of infection (MOI) 10 and that encoding mCherry-melanophilin at MOI 4, 8, or 20. The expression levels were examined by immunoblotting with anti-melanophilin and anti- $\alpha$ -tubulin antibodies (upper left), which indicated that the expression level of mCherry-melanophilin at MOI 4 was similar to that of endogenous melanophilin. The fluorescence intensity (lower left;  $n = 84, 28, 24,$  and  $32$  cells from  $3$  mice for MOI =  $0, 4, 8,$  or  $20,$  respectively) and the localization (right) of mCherry melanophilin were examined by TIRF microscopy. Because the signal of mCherry-melanophilin expressed at MOI 4 was weak (the second row), it was enhanced at 15 times (close to the maximum;  $4^*$  in the first row). Although mCherry-melanophilin localized on granules when expressed at the endogenous level (MOI 4), it exhibited a filamentous distribution, likely along F-actin, when expressed only at two times of the endogenous level (MOI 8). (B) A monolayer of *leaden* islet cells was infected with adenovirus encoding Insulin-EGFP and that encoding mCherry-melanophilin at MOI 4 as described above ( $n = 22$  cells from  $7$  mice). Cells were stimulated by  $25$  mmol/L glucose for  $20$  min, and fusion events were recorded under TIRF microscopy as described in Fig. 2. After the experiments, cells were immediately fixed with  $3\%$  paraformaldehyde and were immunostained with anti-RFP antibody to detect mCherry melanophilin. Boxes in the Insulin-EGFP image indicate the positions where the passenger exocytosis occurs, although they lack EGFP signals in a post-fusion still image. Red boxes at corresponding positions in the mCherry-melanophilin image indicate the presence of melanophilin, whereas white ones indicate its absence. Passengers are categorized into 4 bins and labeled as 1-4 according to the time of fusion events after glucose stimulation. The graph shows the percentage of melanophilin-positive passengers in each bin. Granules fused at early time points (1:  $0-5$  min and 2:  $5-10$  min) tend to lack melanophilin compared with those fused at later time points (3:  $10-15$  min and 4:  $15-20$  min), likely due to occurrence of post-fusion events such as endocytosis during a period from time of fusion till cell fixation at  $20$  min.  $^{\#}P < 0.05$ ; one-way ANOVA. Bars,  $5 \mu\text{m}$ .

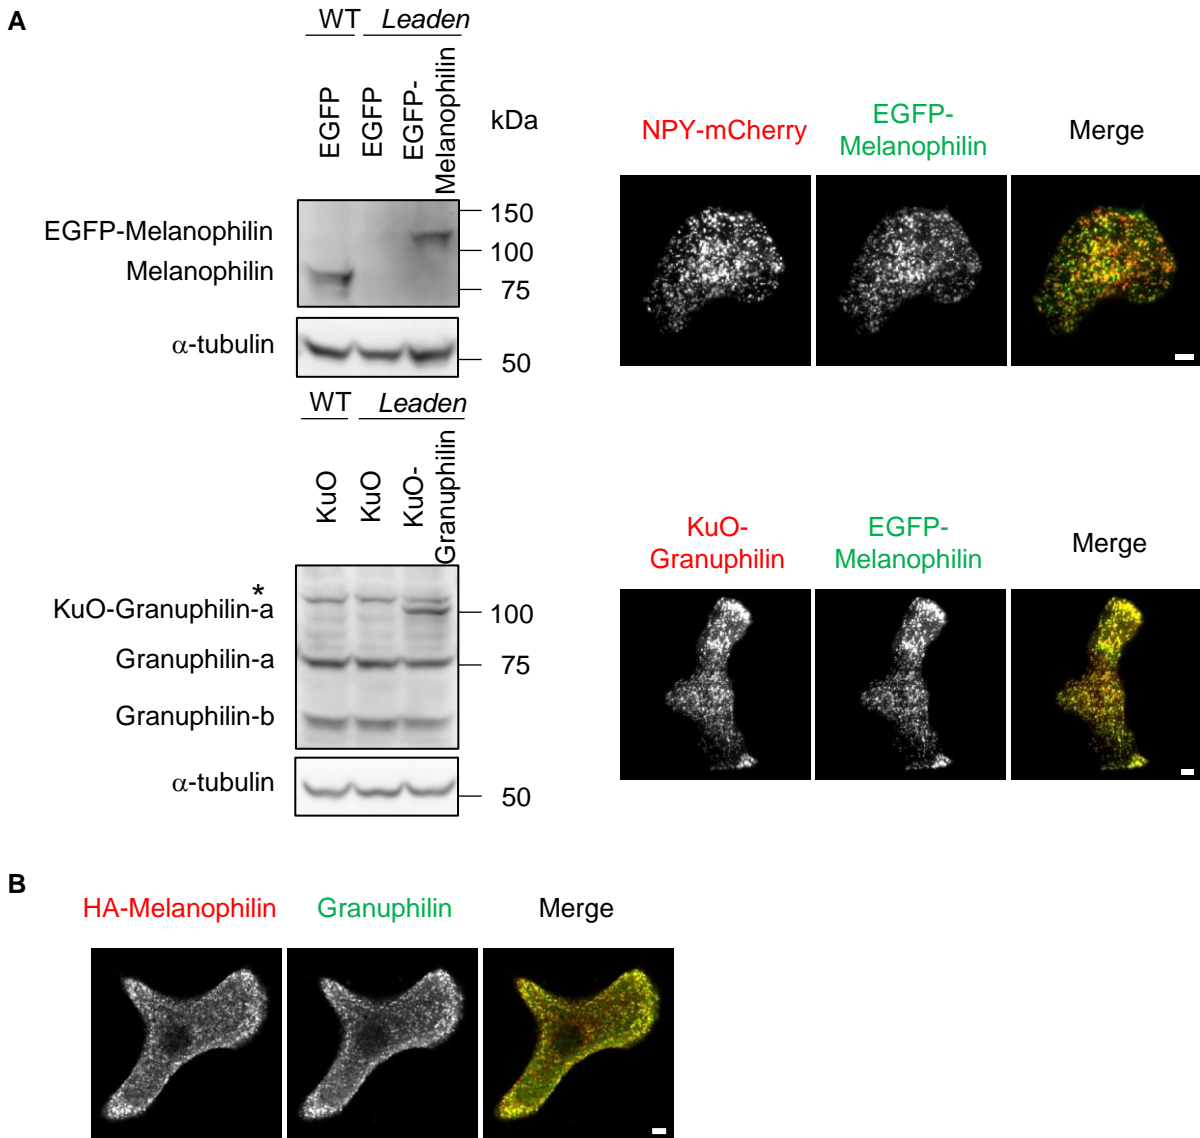

**Supplementary Figure 6. Colocalization of melanophilin and granuphilin on the same granules in *leaden* islet cells**

(A) A monolayer of wild-type or *leaden* islet cells was infected with adenovirus encoding EGFP-melanophilin or EGFP only (upper left), or that encoding Kusabira-Orange 1 (KuO)-granuphilin or KuO only (lower left). Immunoblotting revealed that both EGFP-melanophilin and KuO-granuphilin are expressed in *leaden* cells at endogenous protein levels found in wild-type cells. The band highlighted with an asterisk is a nonspecific protein. At these expression levels, 90 and 97% of EGFP-melanophilin colocalize with NPY-mCherry (upper right) and KuO-granuphilin (lower right, respectively, under TIRF microscopy ( $n = 27-28$  islet cells from 4 *leaden* mice). (B) A monolayer of *leaden* islet cells expressing HA-melanophilin at an endogenous level was immunostained with anti-HA and anti-granuphilin antibodies. Confocal microscopy revealed that 95% of HA-melanophilin colocalizes with endogenous granuphilin ( $n = 18$  cells from 3 mice). Bars, 5  $\mu\text{m}$ .

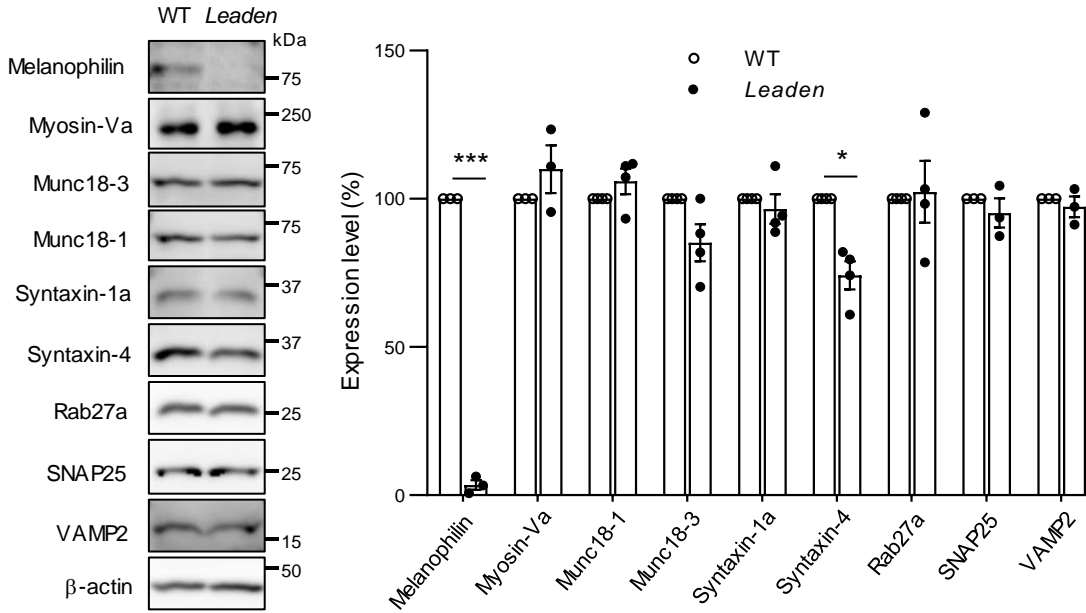

**Supplementary Figure 7. The expression level of syntaxin-4 is decreased in *leaden* islets**  
 Islets extracts (30  $\mu$ g) from wild-type and *leaden* mice were immunoblotted with antibodies toward the indicated proteins (left). Protein expression levels (wild type: open dots; *leaden*: closed dots) were quantified by densitometric analyses from 3-4 independent preparations (right). \* $P < 0.05$ , \*\*\* $P < 0.001$ ; Student's *t*-test.

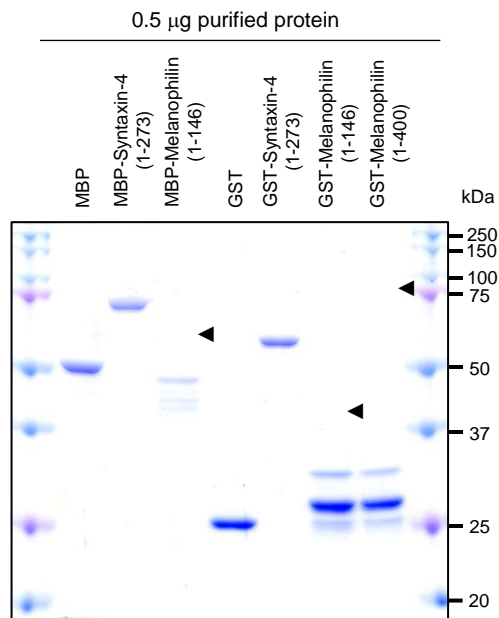

**Supplementary Figure 8. Affinity-purified, syntaxin-4 and melanophilin proteins expressed in bacteria**

Indicated amino acid portions of syntaxin-4 and melanophilin were expressed in *E. coli*, BL21 (DE3). Proteins were purified using amylose-agarose or glutathione-Sepharose 4B, and underwent SDS-PAGE and Coomassie Brilliant Blue staining. Although syntaxin-4 with either MBP or GST tag was efficiently expressed and purified, two different syntaxin-4-binding domains of melanophilin was not. Therefore, protein interaction experiments in Fig. 4G were performed between syntaxin-4 (0.5  $\mu$ g) and 40-fold excess of melanophilin containing its degradation products (20  $\mu$ g). Arrowheads indicate the expected positions of each melanophilin protein with corresponding molecular mass.

## Video Legend

### **Video 1. Granules labeled by pH-insensitive NPY-mCherry lack a flash during fusion**

A monolayer of pancreatic islet cells isolated from wild-type mice was infected with adenovirus encoding Insulin-EGFP (left) or NPY-mCherry (right), and was stimulated by 60 mmol/L KCl for 1 min under TIRF microscopy. Images were sampled every 103 ms, and videos were forwarded at a 3-times speed. Note that pH-insensitive mCherry-labeled granules do not exhibit a flash phenomenon during fusion, in which the pH-sensitive EGFP-fused, cargo protein lights-up with release and immediately disappears with diffusion. Bar, 10  $\mu\text{m}$ .

### **Video 2. An example of the *resident* type of exocytosis in human pancreatic $\beta$ -cells**

Human pancreatic  $\beta$ -cells expressing Insulin-EGFP were stimulated with 25 mmol/L glucose under TIRF microscopy. The images taken every 103 ms for 20 s are shown in a twice speed-forwarded video. Bar, 1  $\mu\text{m}$ .

### **Video 3. An example of the *passenger* type of exocytosis in human pancreatic $\beta$ -cells**

Human pancreatic  $\beta$ -cells expressing Insulin-EGFP were stimulated with 25 mmol/L glucose under TIRF microscopy. The images taken every 103 ms for 20 s are shown in a twice speed-forwarded video. Bar, 1  $\mu\text{m}$ .
